# Supplementary material for: Clustering-Based Method for Developing a Genomic Copy Number Alteration Signature for Predicting the Metastatic Potential of Prostate Cancer
Source: Hindawi journal article supplement (doi:10.1155/2012/873570), 2012-01-01
Supplement: f1 [file 873570.f1.xls]

## Sheet: Metastasis_Genes
index	gene	NYU_Z	NYU_dir	MSKs1_Z	MSKs1_dir	MSKs2_Z	MSKs2_dir	gene_Chr	gene_Cytoband	gene_start	gene_end
1	CLCNKB	NA	NA	NA	NA	2.00139	1	1	p36.13	16242834	16256390
2	ARHGEF10L	NA	NA	2.1	-1	NA	NA	1	p36.13	17738917	17896956
3	ACTL8	NA	NA	1.9	-1	NA	NA	1	p36.13	17954395	18026145
4	DPYD	NA	NA	NA	NA	2.88611	-1	1	p21.3	97315890	98159203
5	COL11A1	NA	NA	NA	NA	1.89243	-1	1	p21.1	103114611	103346640
6	NRXN1	NA	NA	NA	NA	3.23268	-1	2	p16.3	49999148	51113178
7	CTNNA2	NA	NA	NA	NA	1.82276	-1	2	p12	79732191	80729415
8	ALCAM	NA	NA	NA	NA	2.46024	1	3	q13.11	106568403	106778433
9	ZBTB20	NA	NA	1.8	1	NA	NA	3	q13.31	115540230	116348817
10	MYLK	NA	NA	2.8	1	NA	NA	3	q21.1	124811586	125085868
11	KALRN	NA	NA	2.4	1	NA	NA	3	q21.1	125296275	125922726
12	BFSP2	NA	NA	2.4	1	NA	NA	3	q22.1	134601480	134676746
13	SLC9A9	NA	NA	2.7	1	NA	NA	3	q24	144466755	145049979
14	KCNAB1	NA	NA	5.8	1	NA	NA	3	q25.31	157321095	157739621
15	PPM1L	NA	NA	2	1	NA	NA	3	q26.1	161956791	162271511
16	MECOM	NA	NA	2	1	NA	NA	3	q26.2	170283981	170347054
17	DGKG	NA	NA	1.9	1	NA	NA	3	q27.3	187347686	187562717
18	TP63	NA	NA	3	1	NA	NA	3	q28	190831910	191107935
19	LEPREL1	NA	NA	2.6	1	NA	NA	3	q28	191157213	191321407
20	BOD1L	NA	NA	NA	NA	2.35077	-1	4	p15.33	13179464	13238426
21	KCTD8	NA	NA	NA	NA	2.81915	-1	4	p13	43870683	44145581
22	GABRA2	NA	NA	NA	NA	2.2755	-1	4	p12	45946341	46086561
23	LPHN3	NA	NA	NA	NA	2.48055	-1	4	q13.1	62045434	62620762
24	GRID2	NA	NA	NA	NA	5.11029	-1	4	q22.1	93444831	94914730
25	DCHS2	NA	NA	NA	NA	2.78834	-1	4	q32.1	155375138	155632318
26	GLRB	NA	NA	NA	NA	2.65999	-1	4	q32.1	158216788	158312299
27	GRIA2	NA	NA	NA	NA	2.29329	-1	4	q32.1	158361186	158506677
28	FSTL5	NA	NA	NA	NA	2.24068	-1	4	q32.2	162524501	163304636
29	CENPH	NA	NA	1.9	-1	NA	NA	5	q13.2	68521131	68541939
30	MRPS36	NA	NA	2.6	-1	NA	NA	5	q13.2	68549329	68577710
31	CDK7	NA	NA	2.7	-1	NA	NA	5	q13.2	68566471	68609004
32	CCDC125	NA	NA	2	-1	NA	NA	5	q13.2	68612278	68664392
33	TAF9	NA	NA	2.6	-1	NA	NA	5	q13.2	68696327	68701596
34	RAD17	NA	NA	2.6	-1	NA	NA	5	q13.2	68700880	68746384
35	MARVELD2	NA	NA	3	-1	NA	NA	5	q13.2	68746699	68773646
36	MEF2C	NA	NA	NA	NA	2.25844	-1	5	q14.3	88051922	88214780
37	TICAM2	NA	NA	NA	NA	1.82571	-1	5	q22.3	114942247	114989610
38	COL21A1	NA	NA	NA	NA	1.83912	-1	6	p12.1	56029347	56366851
39	COL19A1	NA	NA	NA	NA	3.43328	-1	6	q13	70633169	70978878
40	COL12A1	NA	NA	NA	NA	1.82407	-1	6	q14.1	75850762	75972343
41	UBE2CBP	2.8	-1	NA	NA	NA	NA	6	q14.1	83658836	83832269
42	ME1	2.5	-1	NA	NA	NA	NA	6	q14.2	83976827	84197498
43	MAP3K7	NA	NA	NA	NA	3.1873	-1	6	q15	91282074	91353628
44	EPHA7	NA	NA	NA	NA	1.77549	-1	6	q16.1	94007864	94185993
45	FBXL4	NA	NA	NA	NA	1.74726	-1	6	q16.2	99428055	99502570
46	SIM1	NA	NA	NA	NA	2.19435	-1	6	q16.3	100939606	101019494
47	ASCC3	NA	NA	NA	NA	1.79544	-1	6	q16.3	101062791	101435961
48	NUS1	NA	NA	NA	NA	2.22685	-1	6	q22.2	118103310	118138577
49	TRDN	NA	NA	NA	NA	3.03421	-1	6	q22.31	123579182	123999937
50	UTRN	NA	NA	NA	NA	2.32961	-1	6	q24.2	144654566	145215859
51	EPM2A	NA	NA	NA	NA	2.39718	-1	6	q24.3	145988141	146098684
52	GRM1	NA	NA	NA	NA	1.89884	-1	6	q24.3	146390611	146800427
53	C6orf118	NA	NA	NA	NA	2.7921	-1	6	q27	165613148	165643101
54	PDE10A	NA	NA	NA	NA	4.6945	-1	6	q27	165660766	165995578
55	IQCE	NA	NA	NA	NA	1.84874	1	7	p22.2	2565158	2620893
56	FBXL18	NA	NA	NA	NA	1.86463	1	7	p22.1	5481955	5523646
57	STX1A	NA	NA	NA	NA	2.17872	1	7	q11.23	72751472	72771925
58	CLDN3	NA	NA	NA	NA	2.61792	1	7	q11.23	72821263	72822536
59	EIF4H	NA	NA	NA	NA	2.00655	1	7	q11.23	73226625	73249358
60	LAT2	NA	NA	NA	NA	1.96459	1	7	q11.23	73261662	73282099
61	RFC2	NA	NA	NA	NA	1.83989	1	7	q11.23	73283770	73306674
62	CLIP2	NA	NA	NA	NA	3.09448	1	7	q11.23	73341739	73458196
63	HIP1	NA	NA	NA	NA	4.44164	1	7	q11.23	75001345	75206215
64	TMEM120A	NA	NA	NA	NA	1.70931	1	7	q11.23	75454238	75461913
65	STYXL1	NA	NA	NA	NA	2.30495	1	7	q11.23	75463592	75515257
66	MDH2	NA	NA	NA	NA	1.96528	1	7	q11.23	75515329	75533864
67	YWHAG	NA	NA	NA	NA	2.7386	1	7	q11.23	75794053	75826252
68	STAG3	NA	NA	NA	NA	2.41873	1	7	q22.1	99613474	99659778
69	PILRB	NA	NA	NA	NA	2.93516	1	7	q22.1	99771673	99803388
70	PILRA	NA	NA	NA	NA	1.8998	1	7	q22.1	99809004	99835650
71	MEPCE	NA	NA	NA	NA	2.1134	1	7	q22.1	99865190	99869676
72	TSC22D4	NA	NA	NA	NA	2.1304	1	7	q22.1	99902080	99914838
73	C7orf51	NA	NA	NA	NA	2.19137	1	7	q22.1	99919486	99930358
74	AGFG2	NA	NA	NA	NA	2.28391	1	7	q22.1	99974770	100003778
75	LRCH4	NA	NA	NA	NA	2.2304	1	7	q22.1	100009570	100021712
76	FBXO24	NA	NA	NA	NA	2.48311	1	7	q22.1	100021892	100036674
77	PCOLCE	NA	NA	NA	NA	1.80502	1	7	q22.1	100037818	100043732
78	MOSPD3	NA	NA	NA	NA	2.31444	1	7	q22.1	100047661	100050932
79	TFR2	NA	NA	NA	NA	2.62297	1	7	q22.1	100055975	100077109
80	ACTL6B	NA	NA	NA	NA	1.73621	1	7	q22.1	100078678	100092007
81	GIGYF1	NA	NA	NA	NA	2.71266	1	7	q22.1	100115066	100124806
82	EPO	NA	NA	NA	NA	1.9843	1	7	q22.1	100156359	100159257
83	CPA2	NA	NA	NA	NA	2.13987	1	7	q32.2	129693939	129716870
84	CPA4	NA	NA	NA	NA	1.94323	1	7	q32.2	129720230	129751249
85	CPA5	NA	NA	NA	NA	2.76233	1	7	q32.2	129771892	129795807
86	CPA1	NA	NA	NA	NA	2.0683	1	7	q32.2	129807468	129815165
87	TSGA14	NA	NA	NA	NA	9.37539	1	7	q32.2	129823611	129868133
88	MEST	NA	NA	NA	NA	3.22323	1	7	q32.2	129913282	129933363
89	COPG2	NA	NA	NA	NA	3.11952	1	7	q32.2	129933404	129935887
90	ARHGEF5	NA	NA	NA	NA	2.74723	1	7	q35	143683366	143708657
91	DLGAP2	NA	NA	2.2	-1	NA	NA	8	p23.3	1436939	1644048
92	ARHGEF10	NA	NA	2.9	-1	NA	NA	8	p23.3	1759549	1894206
93	MYOM2	2.1	-1	NA	NA	NA	NA	8	p23.3	1980565	2080779
94	CSMD1	NA	NA	NA	NA	4.62798	-1	8	p23.2	2780282	3258996
95	MFHAS1	3.3	-1	NA	NA	NA	NA	8	p23.1	8679409	8788541
96	ERI1	1.9	-1	NA	NA	NA	NA	8	p23.1	8897856	8928139
97	TNKS	4	-1	NA	NA	NA	NA	8	p23.1	9450855	9677266
98	MSRA	5.1	-1	NA	NA	NA	NA	8	p23.1	9949189	10323803
99	C8orf16	2.2	-1	NA	NA	NA	NA	8	p23.1	11021390	11025155
100	MTMR9	1.9	-1	NA	NA	NA	NA	8	p23.1	11179410	11223062
101	BLK	2.1	-1	NA	NA	NA	NA	8	p23.1	11388930	11459516
102	GATA4	3.2	-1	NA	NA	NA	NA	8	p23.1	11599162	11654918
103	NEIL2	2.7	-1	NA	NA	NA	NA	8	p23.1	11664627	11682263
104	CTSB	2.8	-1	NA	NA	NA	NA	8	p23.1	11737442	11763055
105	C8orf79	2.9	-1	NA	NA	NA	NA	8	p22	12847554	12931653
106	DLC1	6.5	-1	NA	NA	NA	NA	8	p22	12985243	13416766
107	SGCZ	4.7	-1	NA	NA	3.51071	-1	8	p22	13991744	15140219
108	TUSC3	3.1	-1	NA	NA	NA	NA	8	p22	15442101	15666366
109	MTMR7	3.7	-1	NA	NA	NA	NA	8	p22	17199923	17315207
110	SLC7A2	4.1	-1	NA	NA	NA	NA	8	p22	17398975	17472357
111	PDGFRL	4.8	-1	NA	NA	NA	NA	8	p22	17478443	17545655
112	MTUS1	3.6	-1	NA	NA	NA	NA	8	p22	17545584	17702666
113	PCM1	1.7	-1	NA	NA	NA	NA	8	p22	17824646	17935562
114	ASAH1	7.1	-1	NA	NA	NA	NA	8	p22	17958214	17986787
115	NAT2	3.3	-1	NA	NA	NA	NA	8	p22	18293035	18303003
116	PSD3	7.3	-1	NA	NA	NA	NA	8	p22	18429093	18915476
117	SH2D4A	2.9	-1	NA	NA	NA	NA	8	p21.3	19215483	19297594
118	LZTS1	2	-1	NA	NA	NA	NA	8	p21.3	20147956	20205754
119	XPO7	2.3	-1	NA	NA	NA	NA	8	p21.3	21833126	21920041
120	FAM160B2	2.5	-1	1.8	-1	NA	NA	8	p21.3	22002660	22017835
121	NUDT18	NA	NA	2.3	-1	NA	NA	8	p21.3	22020328	22023403
122	HR	NA	NA	2.7	-1	NA	NA	8	p21.3	22027877	22045326
123	REEP4	NA	NA	2.5	-1	NA	NA	8	p21.3	22051478	22055393
124	LGI3	NA	NA	2	-1	NA	NA	8	p21.3	22060290	22070290
125	BMP1	NA	NA	2.2	-1	NA	NA	8	p21.3	22078645	22125782
126	PHYHIP	NA	NA	2.2	-1	NA	NA	8	p21.3	22133162	22145796
127	POLR3D	NA	NA	2.7	-1	NA	NA	8	p21.3	22158564	22164624
128	SLC39A14	1.8	-1	2.2	-1	NA	NA	8	p21.3	22280737	22347462
129	PPP3CC	3.1	-1	2.6	-1	NA	NA	8	p21.3	22354541	22454580
130	SORBS3	NA	NA	3	-1	NA	NA	8	p21.3	22465196	22488952
131	PDLIM2	NA	NA	2.9	-1	NA	NA	8	p21.3	22492199	22511483
132	C8orf58	NA	NA	3	-1	NA	NA	8	p21.3	22513067	22517605
133	KIAA1967	2.8	-1	3.1	-1	NA	NA	8	p21.3	22518202	22533920
134	BIN3	1.7	-1	2.8	-1	NA	NA	8	p21.3	22533906	22582553
135	EGR3	NA	NA	2	-1	NA	NA	8	p21.3	22601119	22606760
136	RHOBTB2	NA	NA	1.7	-1	NA	NA	8	p21.3	22913059	22933655
137	TNFRSF10D	1.9	-1	NA	NA	NA	NA	8	p21.3	23049051	23077485
138	TNFRSF10A	NA	NA	2.2	-1	NA	NA	8	p21.3	23104916	23138584
139	CHMP7	NA	NA	2.4	-1	NA	NA	8	p21.3	23157095	23175450
140	LOXL2	NA	NA	1.9	-1	NA	NA	8	p21.3	23210097	23317667
141	ENTPD4	2.7	-1	NA	NA	NA	NA	8	p21.3	23299386	23371081
142	erw	2.6	-1	NA	NA	NA	NA	8	p21.2	23442308	23486008
143	NKX2-6	2.4	-1	NA	NA	NA	NA	8	p21.2	23615909	23620056
144	DOCK5	5.4	-1	NA	NA	NA	NA	8	p21.2	25098204	25326536
145	KCTD9	2	-1	NA	NA	NA	NA	8	p21.2	25341283	25371837
146	CDCA2	2	-1	NA	NA	NA	NA	8	p21.2	25372428	25421353
147	EBF2	5.1	-1	NA	NA	NA	NA	8	p21.2	25758042	25958292
148	DPYSL2	3.3	-1	NA	NA	NA	NA	8	p21.2	26491327	26571607
149	ADRA1A	3.9	-1	NA	NA	NA	NA	8	p21.2	26661584	26778839
150	STMN4	3.3	-1	NA	NA	NA	NA	8	p21.2	27149738	27171843
151	TRIM35	2.6	-1	NA	NA	NA	NA	8	p21.2	27198321	27224751
152	PTK2B	7	-1	NA	NA	NA	NA	8	p21.2	27224916	27372820
153	CHRNA2	3.5	-1	NA	NA	NA	NA	8	p21.2	27373196	27392730
154	EPHX2	3.3	-1	NA	NA	NA	NA	8	p21.1	27404562	27458403
155	CCDC25	4.4	-1	NA	NA	NA	NA	8	p21.1	27646756	27686089
156	SCARA5	3.3	-1	NA	NA	NA	NA	8	p21.1	27783672	27906117
157	C8orf80	3.6	-1	NA	NA	NA	NA	8	p21.1	27935607	27997307
158	ELP3	3.4	-1	NA	NA	NA	NA	8	p21.1	27999759	28104584
159	HMBOX1	1.8	-1	NA	NA	NA	NA	8	p21.1	28803830	28966706
160	KIF13B	2.7	-1	NA	NA	NA	NA	8	p21.1	28980715	29176529
161	TOX	4.3	1	NA	NA	NA	NA	8	q12.1	59880531	60194321
162	CYP7B1	NA	NA	1.7	1	NA	NA	8	q12.3	65671246	65873902
163	CPA6	3.8	1	NA	NA	NA	NA	8	q13.2	68496963	68821134
164	PREX2	7.5	1	NA	NA	NA	NA	8	q13.2	69026907	69306451
165	C8orf34	6	1	NA	NA	NA	NA	8	q13.2	69405511	69893810
166	SULF1	5.2	1	3.4	1	NA	NA	8	q13.2	70541427	70735701
167	SLCO5A1	4.9	1	4.2	1	NA	NA	8	q13.3	70747129	70909762
168	PRDM14	4.7	1	NA	NA	NA	NA	8	q13.3	71126574	71146116
169	NCOA2	3.2	1	2.4	1	NA	NA	8	q13.3	71178380	71478574
170	LACTB2	2.6	1	NA	NA	NA	NA	8	q13.3	71712045	71743946
171	XKR9	2.7	1	NA	NA	NA	NA	8	q13.3	71755848	71809213
172	EYA1	3.4	1	NA	NA	NA	NA	8	q13.3	72272222	72437021
173	MSC	2	1	NA	NA	NA	NA	8	q13.3	72916332	72919285
174	TRPA1	2.3	1	NA	NA	NA	NA	8	q13.3	73096040	73150373
175	KCNB2	6.8	1	NA	NA	NA	NA	8	q13.3	73642524	74012880
176	RPL7	2.3	1	NA	NA	NA	NA	8	q21.11	74365073	74375857
177	STAU2	4.6	1	NA	NA	NA	NA	8	q21.11	74495160	74821629
178	TCEB1	1.8	1	NA	NA	NA	NA	8	q21.11	75021184	75046959
179	JPH1	6	1	NA	NA	NA	NA	8	q21.11	75309493	75396117
180	GDAP1	2	1	NA	NA	NA	NA	8	q21.11	75425173	75441888
181	PI15	3	1	NA	NA	NA	NA	8	q21.11	75899327	75929819
182	CRISPLD1	4.9	1	NA	NA	NA	NA	8	q21.11	76059531	76109346
183	HNF4G	4.1	1	NA	NA	NA	NA	8	q21.11	76482732	76641600
184	ZFHX4	4.3	1	NA	NA	NA	NA	8	q21.11	77756078	77942076
185	PKIA	3.3	1	NA	NA	NA	NA	8	q21.12	79590891	79678040
186	STMN2	2.8	1	NA	NA	NA	NA	8	q21.13	80685916	80740868
187	HEY1	3	1	NA	NA	NA	NA	8	q21.13	80838801	80842653
188	ZNF704	NA	NA	2.5	1	NA	NA	8	q21.13	81713324	81949571
189	PAG1	NA	NA	2	1	NA	NA	8	q21.13	82042605	82186858
190	IMPA1	NA	NA	1.9	1	NA	NA	8	q21.13	82732751	82761115
191	RALYL	2.8	1	NA	NA	NA	NA	8	q21.2	85604112	85963979
192	CNGB3	1.8	1	NA	NA	NA	NA	8	q21.3	87655277	87825017
193	CNBD1	3.8	1	3.8	1	NA	NA	8	q21.3	87947840	88435220
194	MMP16	NA	NA	3.5	1	NA	NA	8	q21.3	89118580	89408833
195	SLC26A7	NA	NA	2.2	1	NA	NA	8	q21.3	92330692	92479554
196	CDH17	2.8	1	NA	NA	NA	NA	8	q22.1	95208566	95289986
197	PTDSS1	2.5	1	NA	NA	NA	NA	8	q22.1	97343340	97415950
198	SDC2	3.4	1	NA	NA	NA	NA	8	q22.1	97575058	97693213
199	MTDH	NA	NA	1.9	1	NA	NA	8	q22.1	98725583	98807711
200	NIPAL2	1.9	1	NA	NA	NA	NA	8	q22.2	99273563	99375797
201	STK3	1.8	1	NA	NA	NA	NA	8	q22.2	99536037	99907074
202	VPS13B	3.9	1	NA	NA	NA	NA	8	q22.2	100094670	100958983
203	RGS22	2.7	1	NA	NA	NA	NA	8	q22.2	101042452	101187520
204	YWHAZ	NA	NA	2.2	1	NA	NA	8	q22.3	101999980	102034745
205	ZNF706	NA	NA	2.8	1	NA	NA	8	q22.3	102278444	102287136
206	GRHL2	NA	NA	2.4	1	NA	NA	8	q22.3	102574162	102750995
207	NCALD	5.5	1	2.9	1	NA	NA	8	q22.3	102767947	103206311
208	UBR5	NA	NA	2.2	1	NA	NA	8	q22.3	103334748	103493671
209	ATP6V1C1	NA	NA	2.4	1	NA	NA	8	q22.3	104102424	104154461
210	RIMS2	2	1	4	1	NA	NA	8	q22.3	104582291	105333263
211	DPYS	3.2	1	NA	NA	NA	NA	8	q22.3	105460829	105548453
212	LRP12	NA	NA	2	1	NA	NA	8	q22.3	105570643	105670344
213	ZFPM2	4.2	1	6.3	1	NA	NA	8	q23.1	106400323	106885939
214	ANGPT1	2.4	1	NA	NA	NA	NA	8	q23.1	108330899	108579459
215	RSPO2	1.8	1	NA	NA	NA	NA	8	q23.1	108980721	109165052
216	CSMD3	4.9	1	4.2	1	NA	NA	8	q23.3	113304337	114518418
217	TRPS1	2.9	1	2.7	1	NA	NA	8	q23.3	116489900	116750429
218	ZHX2	NA	NA	2.6	1	NA	NA	8	q24.13	123863082	124055936
219	ANXA13	2.1	1	NA	NA	NA	NA	8	q24.13	124762216	124818828
220	KIAA0196	2.6	1	NA	NA	NA	NA	8	q24.13	126105691	126173191
221	POU5F1B	2.9	1	NA	NA	NA	NA	8	q24.21	128497039	128498621
222	MYC	4.2	1	NA	NA	NA	NA	8	q24.21	128816862	128822853
223	TMEM75	3.5	1	NA	NA	NA	NA	8	q24.21	129029046	129029462
224	ASAP1	NA	NA	3.6	1	NA	NA	8	q24.21	131133535	131483399
225	ADCY8	3.1	1	5.4	1	NA	NA	8	q24.22	131861736	132123854
226	EFR3A	3.1	1	NA	NA	NA	NA	8	q24.22	132985517	133095071
227	OC90	1.9	1	NA	NA	NA	NA	8	q24.22	133105667	133167084
228	KCNQ3	6	1	NA	NA	NA	NA	8	q24.22	133210438	133561961
229	TMEM71	2.9	1	NA	NA	NA	NA	8	q24.22	133779633	133842010
230	PHF20L1	2.8	1	NA	NA	NA	NA	8	q24.22	133856786	133930234
231	TG	3.8	1	NA	NA	NA	NA	8	q24.22	133948387	134216325
232	SLA	2.2	1	NA	NA	NA	NA	8	q24.22	134118155	134184479
233	WISP1	2.2	1	NA	NA	NA	NA	8	q24.22	134272494	134310751
234	ZFAT	2.5	1	NA	NA	NA	NA	8	q24.22	135559215	135794463
235	PTK2	NA	NA	2.3	1	NA	NA	8	q24.3	141737683	142080514
236	GRK5	NA	NA	2.4	-1	NA	NA	10	q26.11	120957091	121205118
237	RCOR2	NA	NA	NA	NA	1.71307	1	11	q13.1	63435303	63440892
238	MACROD1	NA	NA	1.9	1	2.89093	1	11	q13.1	63522607	63690109
239	STIP1	NA	NA	NA	NA	1.77663	1	11	q13.1	63709873	63728596
240	SF1	NA	NA	NA	NA	2.47102	1	11	q13.1	64288654	64302817
241	MEN1	NA	NA	NA	NA	2.0513	1	11	q13.1	64327564	64335342
242	CDC42BPG	NA	NA	NA	NA	2.32792	1	11	q13.1	64348240	64368617
243	PPP2R5B	NA	NA	NA	NA	1.80549	1	11	q13.1	64448756	64458523
244	GYS2	NA	NA	NA	NA	2.76158	-1	12	p12.1	21580390	21649048
245	PDS5B	NA	NA	NA	NA	2.04076	-1	13	q13.1	32058564	32250157
246	C13orf23	NA	NA	NA	NA	2.21394	-1	13	q13.3	38482003	38510252
247	ENOX1	NA	NA	NA	NA	5.62347	-1	13	q14.11	42685704	43259044
248	LRCH1	NA	NA	NA	NA	2.38473	-1	13	q14.13	46025304	46222786
249	ESD	NA	NA	NA	NA	2.57933	-1	13	q14.2	46243393	46269368
250	HTR2A	NA	NA	NA	NA	3.29743	-1	13	q14.2	46305514	46368176
251	DIAPH3	NA	NA	NA	NA	3.26533	-1	13	q21.2	59137718	59636120
252	PCDH9	NA	NA	NA	NA	4.5416	-1	13	q21.32	65774970	66702578
253	KLHL1	NA	NA	NA	NA	1.86369	-1	13	q21.33	69172727	69580592
254	DACH1	NA	NA	NA	NA	1.86754	-1	13	q21.33	70910099	71339331
255	GPC5	NA	NA	NA	NA	2.13737	-1	13	q31.3	90848919	92316693
256	NALCN	NA	NA	NA	NA	2.18461	-1	13	q33.1	100504131	100866814
257	TFDP1	NA	NA	2.3	-1	NA	NA	13	q34	113287057	113343500
258	MDGA2	NA	NA	NA	NA	2.83451	-1	14	q21.3	46379045	47213703
259	MEIS2	NA	NA	NA	NA	3.94281	-1	15	q14	34970519	35189740
260	VPS13C	NA	NA	NA	NA	1.78597	-1	15	q22.2	59931884	60139939
261	TBC1D10B	NA	NA	NA	NA	1.82431	1	16	p11.2	30275925	30288587
262	RNF40	NA	NA	NA	NA	2.05783	1	16	p11.2	30681100	30695129
263	CNGB1	1.8	-1	NA	NA	NA	NA	16	q13	56475004	56562513
264	C16orf80	2.2	-1	NA	NA	NA	NA	16	q21	56705000	56720797
265	CDH8	NA	NA	NA	NA	3.73442	-1	16	q21	60244866	60628240
266	NFAT5	2.3	-1	NA	NA	NA	NA	16	q22.1	68156498	68296054
267	WWP2	1.8	-1	NA	NA	NA	NA	16	q22.1	68353710	68533145
268	DDX19A	2.3	-1	NA	NA	NA	NA	16	q22.1	68938322	68964780
269	ST3GAL2	2.4	-1	NA	NA	NA	NA	16	q22.1	68970839	69030492
270	ZFHX3	2.2	-1	NA	NA	NA	NA	16	q22.3	71374285	71639775
271	GLG1	2.1	-1	NA	NA	NA	NA	16	q22.3	73043357	73198518
272	WDR59	2.1	-1	NA	NA	NA	NA	16	q23.1	73464975	73576518
273	BCAR1	2.5	-1	NA	NA	NA	NA	16	q23.1	73820429	73859452
274	CFDP1	3	-1	NA	NA	NA	NA	16	q23.1	73885109	74024888
275	CNTNAP4	3.2	-1	NA	NA	NA	NA	16	q23.1	74868677	75150636
276	ADAMTS18	3.5	-1	NA	NA	NA	NA	16	q23.1	75873527	76026512
277	NUDT7	2.2	-1	NA	NA	NA	NA	16	q23.1	76313912	76333652
278	CLEC3A	2.3	-1	NA	NA	NA	NA	16	q23.1	76613944	76623495
279	WWOX	9.3	-1	NA	NA	NA	NA	16	q23.1	76691052	77803532
280	CDYL2	2.5	-1	NA	NA	NA	NA	16	q23.2	79195176	79395680
281	C16orf46	NA	NA	2.2	-1	NA	NA	16	q23.2	79644603	79668373
282	GCSH	NA	NA	1.9	-1	NA	NA	16	q23.2	79673430	79687481
283	PKD1L2	4.9	-1	2	-1	NA	NA	16	q23.2	79691985	79811477
284	BCMO1	2.9	-1	3.6	-1	NA	NA	16	q23.2	79829797	79882248
285	GAN	2.7	-1	2.4	-1	NA	NA	16	q23.2	79906076	79971441
286	PLCG2	2.9	-1	2.7	-1	NA	NA	16	q23.2	80370408	80549399
287	HSD17B2	2.6	-1	NA	NA	NA	NA	16	q23.3	80626364	80689638
288	CDH13	8	-1	2.9	-1	NA	NA	16	q23.3	81439761	82387705
289	MLYCD	2.4	-1	NA	NA	NA	NA	16	q23.3	82490231	82507286
290	NECAB2	NA	NA	2	-1	NA	NA	16	q23.3	82559738	82593878
291	MBTPS1	2.7	-1	NA	NA	NA	NA	16	q24.1	82644872	82708018
292	HSDL1	NA	NA	2	-1	NA	NA	16	q24.1	82713389	82736265
293	LRRC50	2.4	-1	NA	NA	NA	NA	16	q24.1	82736366	82769024
294	WFDC1	2.3	-1	NA	NA	NA	NA	16	q24.1	82885822	82920888
295	ATP2C2	3.6	-1	NA	NA	NA	NA	16	q24.1	82959634	83055293
296	KIAA1609	NA	NA	1.9	-1	NA	NA	16	q24.1	83068608	83095794
297	KLHL36	NA	NA	1.8	-1	NA	NA	16	q24.1	83239632	83253416
298	USP10	2.3	-1	NA	NA	NA	NA	16	q24.1	83291050	83371026
299	CRISPLD2	2.5	-1	2.9	-1	NA	NA	16	q24.1	83411113	83500614
300	ZDHHC7	NA	NA	2.5	-1	NA	NA	16	q24.1	83565573	83602642
301	KIAA0513	NA	NA	2.1	-1	NA	NA	16	q24.1	83618911	83685327
302	KIAA0182	NA	NA	2	-1	NA	NA	16	q24.1	84202524	84267311
303	GINS2	NA	NA	2.1	-1	NA	NA	16	q24.1	84268782	84280089
304	C16orf74	NA	NA	2.3	-1	NA	NA	16	q24.1	84298624	84342190
305	COX4NB	NA	NA	2.5	-1	NA	NA	16	q24.1	84369737	84390601
306	COX4I1	NA	NA	2.6	-1	NA	NA	16	q24.1	84390697	84398109
307	IRF8	NA	NA	2.5	-1	NA	NA	16	q24.1	84490275	84513710
308	FOXF1	NA	NA	2.2	-1	NA	NA	16	q24.1	85101634	85105570
309	MTHFSD	NA	NA	2.4	-1	NA	NA	16	q24.1	85121284	85157509
310	JPH3	2.4	-1	2.4	-1	NA	NA	16	q24.2	86194000	86289263
311	KLHDC4	NA	NA	2.5	-1	NA	NA	16	q24.2	86298920	86357056
312	SLC7A5	1.7	-1	3	-1	NA	NA	16	q24.2	86421131	86460615
313	CA5A	2.6	-1	3.8	-1	NA	NA	16	q24.2	86479126	86527613
314	BANP	2.6	-1	3.3	-1	NA	NA	16	q24.2	86542539	86668425
315	ZFPM1	NA	NA	2.5	-1	NA	NA	16	q24.2	87047226	87128890
316	C16orf85	NA	NA	2.1	-1	NA	NA	16	q24.2	87147613	87164049
317	ZC3H18	NA	NA	2.1	-1	NA	NA	16	q24.2	87164343	87225756
318	IL17C	NA	NA	1.8	-1	NA	NA	16	q24.3	87232502	87234385
319	CYBA	NA	NA	2.9	-1	NA	NA	16	q24.3	87237199	87244958
320	MVD	NA	NA	2.3	-1	NA	NA	16	q24.3	87245849	87257019
321	SNAI3	NA	NA	2.4	-1	NA	NA	16	q24.3	87271591	87280383
322	RNF166	NA	NA	2.2	-1	NA	NA	16	q24.3	87290411	87300312
323	FAM38A	NA	NA	2.7	-1	NA	NA	16	q24.3	87302916	87330317
324	CDT1	NA	NA	2	-1	NA	NA	16	q24.3	87397687	87403166
325	GALNS	NA	NA	2.3	-1	NA	NA	16	q24.3	87407644	87450885
326	TRAPPC2L	NA	NA	1.9	-1	NA	NA	16	q24.3	87451007	87455020
327	CBFA2T3	NA	NA	1.9	-1	NA	NA	16	q24.3	87468768	87570902
328	CDH15	NA	NA	1.9	-1	NA	NA	16	q24.3	87765664	87789400
329	ANKRD11	3	-1	3.7	-1	NA	NA	16	q24.3	87861536	88084470
330	FANCA	NA	NA	1.9	-1	NA	NA	16	q24.3	88331460	88410566
331	SPIRE2	NA	NA	1.7	-1	NA	NA	16	q24.3	88422408	88465228
332	TCF25	NA	NA	2.1	-1	NA	NA	16	q24.3	88467520	88505287
333	TUBB3	NA	NA	2.6	-1	NA	NA	16	q24.3	88513168	88530006
334	DEF8	NA	NA	1.9	-1	NA	NA	16	q24.3	88542684	88561968
335	AFG3L1	NA	NA	2.3	-1	NA	NA	16	q24.3	88566489	88594696
336	GAS8	NA	NA	2.9	-1	NA	NA	16	q24.3	88616509	88638880
337	DNAH2	1.8	-1	NA	NA	NA	NA	17	p13.1	7562746	7677783
338	NKIRAS2	NA	NA	NA	NA	1.96342	1	17	q21.2	37422564	37431180
339	DHX58	NA	NA	NA	NA	8.91158	1	17	q21.2	37506979	37518277
340	KAT2A	NA	NA	NA	NA	3.19779	1	17	q21.2	37518657	37526872
341	HSPB9	NA	NA	NA	NA	2.93659	1	17	q21.2	37528361	37528897
342	RAB5C	NA	NA	NA	NA	3.53992	1	17	q21.2	37530524	37560548
343	KCNH4	NA	NA	NA	NA	3.75013	1	17	q21.2	37562439	37586822
344	GHDC	NA	NA	NA	NA	1.75231	1	17	q21.2	37594632	37599722
345	NOTUM	NA	NA	NA	NA	2.67562	1	17	q25.3	77503689	77512353
346	ASPSCR1	NA	NA	NA	NA	1.7635	1	17	q25.3	77528715	77568569
347	DUS1L	NA	NA	NA	NA	2.27049	1	17	q25.3	77609043	77629242
348	FASN	NA	NA	NA	NA	3.00273	1	17	q25.3	77629504	77649395
349	CDH2	NA	NA	NA	NA	3.44664	-1	18	q12.1	23784934	24011189
350	NOL4	NA	NA	NA	NA	3.91134	-1	18	q12.1	29685062	30057513
351	DTNA	NA	NA	NA	NA	2.23783	-1	18	q12.1	30327279	30725806
352	DCC	NA	NA	NA	NA	6.62113	-1	18	q21.2	48121156	49311780
353	WDR7	NA	NA	NA	NA	1.99527	-1	18	q21.31	52469614	52848040
354	CD226	NA	NA	NA	NA	3.30324	-1	18	q22.2	65681175	65775140
355	ZSWIM4	NA	NA	NA	NA	2.81203	1	19	p13.13	13767274	13804044
356	C19orf57	NA	NA	NA	NA	2.7945	1	19	p13.12	13854168	13877909
357	CC2D1A	NA	NA	NA	NA	3.97052	1	19	p13.12	13878014	13902691
358	RFX1	NA	NA	NA	NA	2.17238	1	19	p13.12	13933353	13978097
359	PLCB1	NA	NA	NA	NA	1.9352	-1	20	p12.3	8061296	8813547
360	SMARCB1	NA	NA	1.8	-1	NA	NA	22	q11.23	22459150	22506703
361	TBC1D22A	NA	NA	4.6	-1	NA	NA	22	q13.31	45537193	45948399
362	RAB9A	NA	NA	3.7	1	NA	NA	23	p22.2	13617262	13637681
363	TFE3	NA	NA	2.1	1	NA	NA	23	p11.23	48772613	48787722
364	HEPH	1.8	1	NA	NA	NA	NA	23	q12	65299388	65403956
365	EDA2R	2	1	NA	NA	NA	NA	23	q12	65732204	65775608
366	AR	2.3	1	2.6	1	NA	NA	23	q12	66680599	66860844
367	OPHN1	5.8	1	NA	NA	NA	NA	23	q12	67179440	67570372
368	NLGN4Y	NA	NA	NA	NA	2.41881	-1	24	q11.221	15144026	15466924
